# Supplementary material
Source: PubMed Central journal article supplement (PMC7398477)
Supplement: gutjnl-2020-321553supp001.pdf [file gutjnl-2020-321553supp001.pdf]

Supplementary Table 1

| Society/<br>Date        | Recommendations for Transplant Activity                                                                                          | Donor screening for COVID-19                                                                                                                                                                                                                            |                                                                                                            | Recipient screening                                                                               |
|-------------------------|----------------------------------------------------------------------------------------------------------------------------------|---------------------------------------------------------------------------------------------------------------------------------------------------------------------------------------------------------------------------------------------------------|------------------------------------------------------------------------------------------------------------|---------------------------------------------------------------------------------------------------|
|                         |                                                                                                                                  | Deceased donor screening                                                                                                                                                                                                                                | Living Donor screening                                                                                     |                                                                                                   |
| TTS<br>16 March, 2020   | DDLT or LDLT- If widespread community transmission - temporarily halt the transplant program, especially if resource constraints | <b>Whom to screen</b><br>Clinical symptoms of COVID-19<br>Exposure History to COVID-19<br>Universal screen with PCR in areas of widespread community spread<br>Unexplained Respiratory failure<br><br><b>Contraindications</b><br>Positive COVID-19 NAT | Proceed with asymptomatic donors<br><br>Symptomatic donors or history of exposure-<br>Deferred for 14 days | Proceed with asymptomatic recipients<br><br>Symptomatic recipients or history of exposure - avoid |
| AASLD<br>16 April, 2020 | DDLT falls in CMS Tier 3b - should not be postponed<br><br>LDLT - suspend except in pediatric ALF                                | <b>Whom to screen</b><br>Clinical symptoms of COVID-19<br>Exposure History to COVID-19<br><br><b>Contraindications</b><br>Positive COVID-19 NAT and/or Chest X ray concerning for COVID-19                                                              | Proceed with asymptomatic donors<br><br>Symptomatic donors or history of exposure- avoid                   | Proceed with asymptomatic recipients<br><br>Symptomatic recipients or history of exposure- avoid  |
| ILTS<br>27 Feb, 2020    | DDLT and LDLT- Proceed with transplant, but exercise extreme caution                                                             | Avoid all donors from endemic/high prevalence area                                                                                                                                                                                                      | Proceed with asymptomatic donors<br><br>Defer for 14 days travel from endemic area                         | Proceed with asymptomatic recipients<br><br>Defer for 14 days travel from endemic area            |
| ASTS<br>24 March, 2020  | DDLT - Proceed with caution,<br><br>LDLT - Suspend (assuming recipient can wait)                                                 | Suggested Donor NAT testing                                                                                                                                                                                                                             |                                                                                                            |                                                                                                   |
| CST                     | DDLT or LDLT-                                                                                                                    |                                                                                                                                                                                                                                                         | All living donors- screen with NP                                                                          | Proceed with asymptomatic                                                                         |

|                                   |                                                                          |                                                                                                                                                                                                                             |                                                                                                 |                                                                                                           |
|-----------------------------------|--------------------------------------------------------------------------|-----------------------------------------------------------------------------------------------------------------------------------------------------------------------------------------------------------------------------|-------------------------------------------------------------------------------------------------|-----------------------------------------------------------------------------------------------------------|
| 09 April, 2020                    | Proceed with caution                                                     | Universal NP or BAL NAT                                                                                                                                                                                                     | NAT within 48h prior to transplant                                                              | recipients<br>Symptomatic recipients or history of exposure- avoid                                        |
| JST<br>11 April, 2020             | DDLT - suspend<br>LDLT- proceed with extreme caution                     |                                                                                                                                                                                                                             | Home-quarantined for 14 days prior to LDLT                                                      | Home-quarantined for 14 days prior to LDLT                                                                |
| KST                               | LDLT- proceed with extreme caution                                       | Universal NP NAT screening                                                                                                                                                                                                  | All living donors- screen with NP NAT<br><br>Defer LDLT 14 days if donor from hyperendemic area | Proceed with asymptomatic recipients<br><br>Defer for 14 days travel from endemic area                    |
| Swiss Transplant<br>9 April, 2020 | DDLT - Case-by-case transplant decision<br>LDLT - suspended till 3rd May | Universal BAL, NP or OP NAT- within 72h                                                                                                                                                                                     | All living donors- screen with NP NAT within 72 hours prior to transplant                       | Proceed with asymptomatic recipients<br><br>Symptomatic recipients or history of exposure- NP-NAT testing |
| Spain<br>13 April, 2020           | DDLT and LDLT- Proceed with caution                                      | Epidemiological risk (exposure to confirmed COVID19, travel or residence at affected area within 21days)<br>Clinical Screening<br>If both positive then reject, if one of them positive then BAL or NP or OP NAT within 24h | All living donors- screen with NP NAT<br><br>Avoid LDLT if donor from hyperendemic area         | NP- NAT in all LDLT recipients                                                                            |
| Italy<br>03 March, 2020           | DDLT and LDLT- Proceed with caution                                      | Universal BAL or NP or OP NAT within 72h<br>+<br>Blood sample for viraemia                                                                                                                                                  | All living donors- screen with NP NAT within 7 days prior to transplant                         |                                                                                                           |
| Argentina<br>20 March, 2020       | DDLT and LDLT - Suspended for non-urgent                                 | Universal NAT<br>If not available then Risk stratification with Epidemiological + Clinical                                                                                                                                  | All living donors- screen with NP NAT<br><br>Avoid LDLT if possible                             | Proceed with asymptomatic recipients<br><br>Symptomatic recipients or history                             |

|                        |                                                        | screening                                          |                                                                     | of exposure- avoid                                                  |
|------------------------|--------------------------------------------------------|----------------------------------------------------|---------------------------------------------------------------------|---------------------------------------------------------------------|
| LTSI<br>13 April, 2020 | DDLT- Proceed with caution<br>LDLT- Suspend non-urgent | Universal NP-NAT<br>+<br>Serology (when available) | Exposure Screen &<br>Universal NP-NAT<br>+<br>Serology if available | Exposure Screen &<br>Universal NP-NAT<br>+<br>Serology if available |

Abbreviations: TTS -The Transplantation society, AASLD - American Association for the Study of Liver Diseases, ILTS - International Liver Transplantation Society, ASTS - American Society of Transplant Surgeons, CST - Canada Society of Transplantation, JST - Japan Society of Transplantation, KST - Korean Society of Transplantation, LTSI - Liver Transplant Society of India. NAT - Nucleic acid testing, NP - Nasopharyngeal, OP- Oropharyngeal, BAL - Broncho-Alveolar Lavage. DDLT - Deceased donor liver transplantation, LDLT - Living donor liver transplantation.
